# Supplementary material
Source: PubMed Central journal article supplement (PMC5632125)
Supplement: NIHMS867806-supplement.pdf [file NIHMS867806-supplement.pdf]

**Supplemental Section Table 1: List of articles about state-level immigration policy and Latino health included in final review**

| <b>Author</b>                                                              | <b>Title</b>                                                                                                                                | <b>Journal/Volume/Issue/Page Numbers</b>                                                   | <b>Study Type</b> |
|----------------------------------------------------------------------------|---------------------------------------------------------------------------------------------------------------------------------------------|--------------------------------------------------------------------------------------------|-------------------|
| Angus, L., DeVoe, J.                                                       | Evidence that the citizenship mandate curtailed participation in Oregon’s Medicaid family planning program.                                 | Health Affairs. 2010;29(4):690-8.                                                          | Quantitative      |
| Aranda, E., Vaquera, E.                                                    | Racism, the immigration enforcement regime, and the implications for racial inequality in the lives of undocumented young adults.           | Sociology of Race and Ethnicity. 2015;1(1):88–104.                                         | Qualitative       |
| Bauer, J., et al                                                           | The impact of citizenship documentation requirements on access to Medicaid for pregnant women in Oregon.                                    | Maternal and Child Health Journal. 2011;15(6):753-758.                                     | Quantitative      |
| Beniflah, J.D., Little W.K., Simon H.K., Sturm, J.                         | Effects of Immigration Enforcement Legislation on Hispanic Pediatric Patient Visits to the Pediatric Emergency Department                   | Clinical Pediatrics. 2013; 52(12): 1122-1126                                               |                   |
| Berk, M.L., Schur, C.L.                                                    | The effect of fear on access to care among undocumented Latino immigrants.                                                                  | Journal of Immigrant Health. 2001;3(3):151-6.                                              | Quantitative      |
| Cho, R.M.                                                                  | Effects of welfare reform policies on Mexican immigrants' infant mortality rates.                                                           | Social Science Research. 2011;40(2);641–653.                                               | Quantitative      |
| Filindra, A., Blanding, D., Coll, C.G.                                     | The power of context: state-level policies and politics and the educational performance of the children of immigrants in the United States. | Harvard Educational Review. 2011;81(3):407-437.                                            | Quantitative      |
| Fleming, P.J., Villa-Torres, L., Taboada, A., Richards, C., Barrington, C. | Marginalisation, discrimination and the health of Latino immigrant day labourers in a central North Carolina community.                     | Health and Social Care in the Community. 2016; Epub ahead of print. DOI: 10.1111/hsc.12338 | Qualitative       |
| Flores, S.M.                                                               | State DREAM acts: the effect of in-state resident tuition policies and undocumented Latino students.                                        | Review of Higher Education: 2010;33(2):239-283.                                            | Quantitative      |
| Fountain, C., Bearman, P.                                                  | Risk as social context: immigration policy and autism in California.                                                                        | Sociological Forum. 2011;26(2):215-240.                                                    | Quantitative      |

|                                                               |                                                                                                                                                                       |                                                                     |                              |
|---------------------------------------------------------------|-----------------------------------------------------------------------------------------------------------------------------------------------------------------------|---------------------------------------------------------------------|------------------------------|
| Gomberg-Munoz, R.,<br>Nussbaum, L.                            | Is immigration policy labor policy?: immigration enforcement, undocumented workers, and the state.                                                                    | Human Organization. 2011;70(4):366-375.                             | Qualitative                  |
| Gonzales, R.G.,<br>Terriquez, V.,<br>Ruszczuk, S.P.           | Becoming DACAmented: assessing the short-term benefits of deferred action for childhood arrivals (DACA).                                                              | American Behavioral Scientist. 2014;58(14):1852-1872.               | Quantitative                 |
| Graefe, D.R.,<br>Hasanali, S.H., De<br>Jong, G.F., Galvan, C. | CHIP-ing away at health disparities: has state-provided health insurance reduced race- and nativity-based differences in health care utilization among U.S. children? | Canadian Public Policy. 2015; 41(Supplement 2):S70-S79.             | Quantitative                 |
| Hacker, K., et al                                             | The impacts of immigration and customs enforcement on immigrant health: perceptions of immigrants in Everett, Massachusetts, USA.                                     | Social Science & Medicine. 2011;73(4):586-94 .                      | Qualitative                  |
| Hagan, J., Rodriguez,<br>N., Capps, R., Kabiri,<br>N.         | The effects of recent welfare and immigration reforms on immigrants' access to health care.                                                                           | International Migration Review. 2003;37(2):444-463.                 | Qualitative/<br>Quantitative |
| Hardy, L., et al                                              | A call for further research on the impact of state-level immigration policies on public health.                                                                       | American Journal of Public Health. 2012;102(7):1250-4.              | Qualitative/<br>Quantitative |
| Hatzenbuehler, M.,et<br>al                                    | Immigration policies and mental health morbidity among Latinos: a state-level analysis.                                                                               | Social Science & Medicine. 2017; 174:169-178.                       | Quantitative                 |
| Hessol, N.A.,<br>Vittinghoff, E.,<br>Fuentes-Afflick, E.      | Reduced risk of inadequate prenatal care in the era after Medicaid expansions in California.                                                                          | Medical Care. 2004;42(5):416-22.                                    | Quantitative                 |
| Jiménez-Silva, M.,<br>Cheatham, G.A.,<br>Gomez, L.            | Views from inside a pediatric clinic: how Arizona's political climate has impacted Arizona's youngest learners.                                                       | Association of Mexican American Educators Journal. 2013;7(2):50-60. | Qualitative                  |
| Kaushal, N.                                                   | In-state tuition for the undocumented: education effects on Mexican young adults.                                                                                     | Journal of Policy Analysis and Management. 2008;27(4):771-792.      | Quantitative                 |
| Kline, N.                                                     | Pathogenic policy: immigrant policing, fear, and parallel medical systems in the U.S. South.                                                                          | Medical Anthropology. 2016;16:1-15.                                 | Qualitative                  |

|                                                                            |                                                                                                                                                                 |                                                                                                     |                              |
|----------------------------------------------------------------------------|-----------------------------------------------------------------------------------------------------------------------------------------------------------------|-----------------------------------------------------------------------------------------------------|------------------------------|
| Langellier, B.A., de Zapien, J.G., Rosales, C., Ingram, M., Carvajal, S.C. | State Medicaid expansion, community interventions, and health care disparities in a United States-Mexico border community.                                      | American Journal of Public Health. 2014;104(8):e94-e100.                                            | Quantitative                 |
| Marx, J.L., et al                                                          | The effects of California Proposition 187 on ophthalmology clinic utilization at an inner-city urban hospital.                                                  | Ophthalmology. 1996;103(5):847-51.                                                                  | Quantitative                 |
| Menjivar, C.                                                               | Immigrant criminalization in law and the media: effects on Latino Immigrant workers' identities in Arizona.                                                     | American Behavioral Scientist. 2016;60(5-6):597-61.                                                 | Qualitative                  |
| Morales, A., Herrera, S., Murry, Kevin.                                    | Navigating the waves of social and political capriciousness: inspiring perspectives from DREAM-eligible immigrant students.                                     | Journal of Hispanic Higher Education. 2011;10(3):266-283.                                           | Qualitative/<br>Quantitative |
| Moya, E.M., Shedlin, M.G.                                                  | Policies & laws affecting Mexican-origin immigrant access and utilization of substance abuse treatment: obstacles to recovery and immigrant health.             | Substance Use & Misuse. 2008;43(12-13):1747-69.                                                     | Qualitative                  |
| Park, L.S., Sarnoff, R., Bender, C., Korenbrot, C.                         | Impact of recent welfare and immigration reforms on use of Medicaid for prenatal care by immigrants in California.                                              | Journal of Immigrant Health. 2000;2(1):5-22.                                                        | Qualitative                  |
| Potochnick, S., Chen, J.H., Perreira, K.                                   | Local-level immigration enforcement and food insecurity risk among Hispanic immigrant families with children: national-level evidence.                          | Journal of Immigrant and Minority Health. 2016; Epub ahead of print. DOI: 10.1007/s10903-016-0464-5 | Quantitative                 |
| Quiroga, S.S., Medina, D.M., Glick, J.                                     | In the belly of the beast: effects of anti-immigration policy on Latino community members.                                                                      | American Behavioral Scientist. 2014;58(13):1723-1742.                                               | Qualitative/<br>Quantitative |
| Raymond-Flesch, M., Siemons, R., Pourat, N., Jacobs, K., Brindis, C.D.     | “There is no help out there and if there is, it's really hard to find”: a qualitative study of the health concerns and health care access of Latino “DREAMers”. | Journal of Adolescent Health. 2014;55(3):323-328.                                                   | Qualitative                  |

|                                                        |                                                                                                                                                                           |                                                                                                     |                              |
|--------------------------------------------------------|---------------------------------------------------------------------------------------------------------------------------------------------------------------------------|-----------------------------------------------------------------------------------------------------|------------------------------|
| Rhodes, S.D., et al                                    | The impact of local immigration enforcement policies on the health of immigrant Hispanics/Latinos in the United States.                                                   | American Journal of Public Health. 2015;105(2):329-37.                                              | Qualitative/<br>Quantitative |
| Sabo, S., Lee, A.E.                                    | The spillover of U.S. immigration policy on citizens and permanent residents of Mexican descent: how internalizing “illegality” impacts public health in the borderlands. | Frontiers in Public Health. 2015;3:(155):1–9.                                                       | Quantitative                 |
| Sabo, S., et al                                        | Everyday violence, structural racism and mistreatment at the U.S.–Mexico border.                                                                                          | Social Science & Medicine. 2014;109:66-74.                                                          | Qualitative/<br>Quantitative |
| Salas, L.M., Ayon, C., Gurrola, M.                     | Estamos traumatados: the effect of anti-immigrant sentiment and policies on the mental health of Mexican immigrant families.                                              | Journal of Community Psychology. 2013;41(8):1005-1020.                                              | Qualitative                  |
| Toomey, R.B. et al                                     | Impact of Arizona’s SB 1070 immigration law on utilization of health care and public assistance among Mexican-origin adolescent mothers and their mother figures.         | American Journal of Public Health. 2014;104(Sup1):S28-34.                                           | Quantitative                 |
| Vargas, E.D.                                           | Immigration enforcement and mixed-status families: the effects of risk of deportation on Medicaid use.                                                                    | Children and Youth Services Review. 2015;57:83–89.                                                  | Quantitative                 |
| Vargas, E.D., Ybarra, V.D.                             | U.S. citizen children of undocumented parents: the link between state immigration policy and the health of Latino children.                                               | Journal of Immigrant and Minority Health. 2016; Epub ahead of print. DOI: 10.1007/s10903-016-0463-6 | Quantitative                 |
| White, K., Yeager, V.A., Menachemi, N., Scarinci, I.C. | Impact of Alabama’s immigration law on access to health care among Latina immigrants and children: implications for national reform.                                      | American Journal of Public Health. 2014;104(3):397–405.                                             | Qualitative                  |
| Winham, D.M., Armstrong Florian, T.L.                  | Nativity, not acculturation, predicts SNAP usage among low-income Hispanics with food insecurity.                                                                         | Journal of Hunger & Environmental Nutrition. 2015;10(2):202-213.                                    | Quantitative                 |
| Zhu, L., Xu, P.                                        | The politics of welfare exclusion: immigration and disparity in Medicaid coverage.                                                                                        | Policy Studies Journal. 2015;43(4):456–483.                                                         | Quantitative                 |
